# Supplementary material for: Unravelling structures of radicals of kynurenic acid formed in the photoinduced reactions with tryptophan and N-acetyl tyrosine
Source: Royal Society of Chemistry journal article supplement (doi:10.1039/d2cp03245g), 2022-01-01
Supplement: d2cp03245g1.pdf [file d2cp03245g1.pdf]

# **Unravelling Structures of Radicals of Kynurenic Acid Formed in the Photoinduced Reactions with Tryptophan and Tyrosine**

Olga B. Morozova,<sup>a</sup> Maksim P. Geniman,<sup>a,b</sup> Mikhail S. Panov,<sup>a</sup>

Natalya N. Fishman<sup>a</sup>, Alexandra V. Yurkovskaya<sup>a</sup>, and Peter S. Sherin<sup>\*a</sup>

<sup>a</sup>International Tomography Center, Institutskaya 3a, 630090 Novosibirsk, Russia

<sup>b</sup>Novosibirsk State University, Pirogova 2, 630090 Novosibirsk, Russia

# Electronic Supplementary Information

## Contents

|                                                                                                                                                                                                                                                                                                                                                                                      | Page |
|--------------------------------------------------------------------------------------------------------------------------------------------------------------------------------------------------------------------------------------------------------------------------------------------------------------------------------------------------------------------------------------|------|
| Scheme S1. Possible pathways of proton-coupled electron transfer to different tautomeric forms of triplet kynurenic acid, $^3\text{KNAH}^-$ , and radical structures formed so far                                                                                                                                                                                                   | 3    |
| Scheme S2. Possible pathways of proton-coupled electron transfer to different tautomeric forms of triplet 4-hydroxy quinolone, $^3\text{4HQNH}$ , and radical structures formed so far                                                                                                                                                                                               | 3    |
| Table S1. Calculated HFCCs of 4-hydroxy quinoline (4HQN) radicals of different structure                                                                                                                                                                                                                                                                                             | 4    |
| Table S2. Calculated HFCCs of kynurenic acid (KNA) radicals of different structure                                                                                                                                                                                                                                                                                                   | 5    |
| Table S3. Calculated HFCCs of neutral tryptophan and N-acetyl tryptophan radicals                                                                                                                                                                                                                                                                                                    | 6    |
| Table S4. HFCCs of neutral N-acetyl tyrosine radical, determined utilizing the CIDNP proportionality relationship between HFCCs and CIDNP intensities detected in the photoreaction of 3,3',4,4'-tetracarboxy benzophenone (TCBP) and N-AcTyr using the known HFCCs for TCBP radicals                                                                                                | 7    |
| Fig. S1. 200 MHz $^1\text{H}$ CIDNP spectra, obtained in the photoreaction of 0.5 mM 3,3',4,4'-tetracarboxy benzophenone (TCBP) and 2 mM N-acetyl tyrosine in neutral aqueous solution                                                                                                                                                                                               | 7    |
| Fig. S2. Correlation between the $^1\text{H}$ CIDNP intensities of TCBP (circles) $P_{1i}$ detected in its photoreaction with N-acetyl tyrosine, and the corresponding $^1\text{H}$ HFCCs of the TCBP radical                                                                                                                                                                        | 8    |
| Fig. S3. Correlation between the $^1\text{H}$ CIDNP intensities $P_{1i}$ of KNA $P_{1i}$ and $-P_{2j}$ of the amino acid detected in the photoreaction between KNA and N-AcTyr, N-AcTrp (subplot b) or L-Trp, and the corresponding $^1\text{H}$ HFCCs of the radicals $\text{KNAH}_2^{\bullet-}$ (a), $\text{N-AcTyrO}^\bullet$ , $\text{N-AcTrp}^\bullet$ , $\text{Trp}^\bullet$ . | 8    |
| Fig. S4. Absorption spectra of neutral aqueous solutions of (a) 0.4 mM 4HQN; (b) 0.4 mM 4HQN and 20 mM N-acetyl tyrosine; (c) 0.4 mM 4HQN and 4 mM L-tryptophan; (d) 0.6 mM KNA; (e) 0.6 mM KNA and 20 mM N-acetyl tyrosine; (f) 0.6 mM 4KNA and 4 mM L-tryptophan.                                                                                                                  | 9    |
| References                                                                                                                                                                                                                                                                                                                                                                           | 10   |

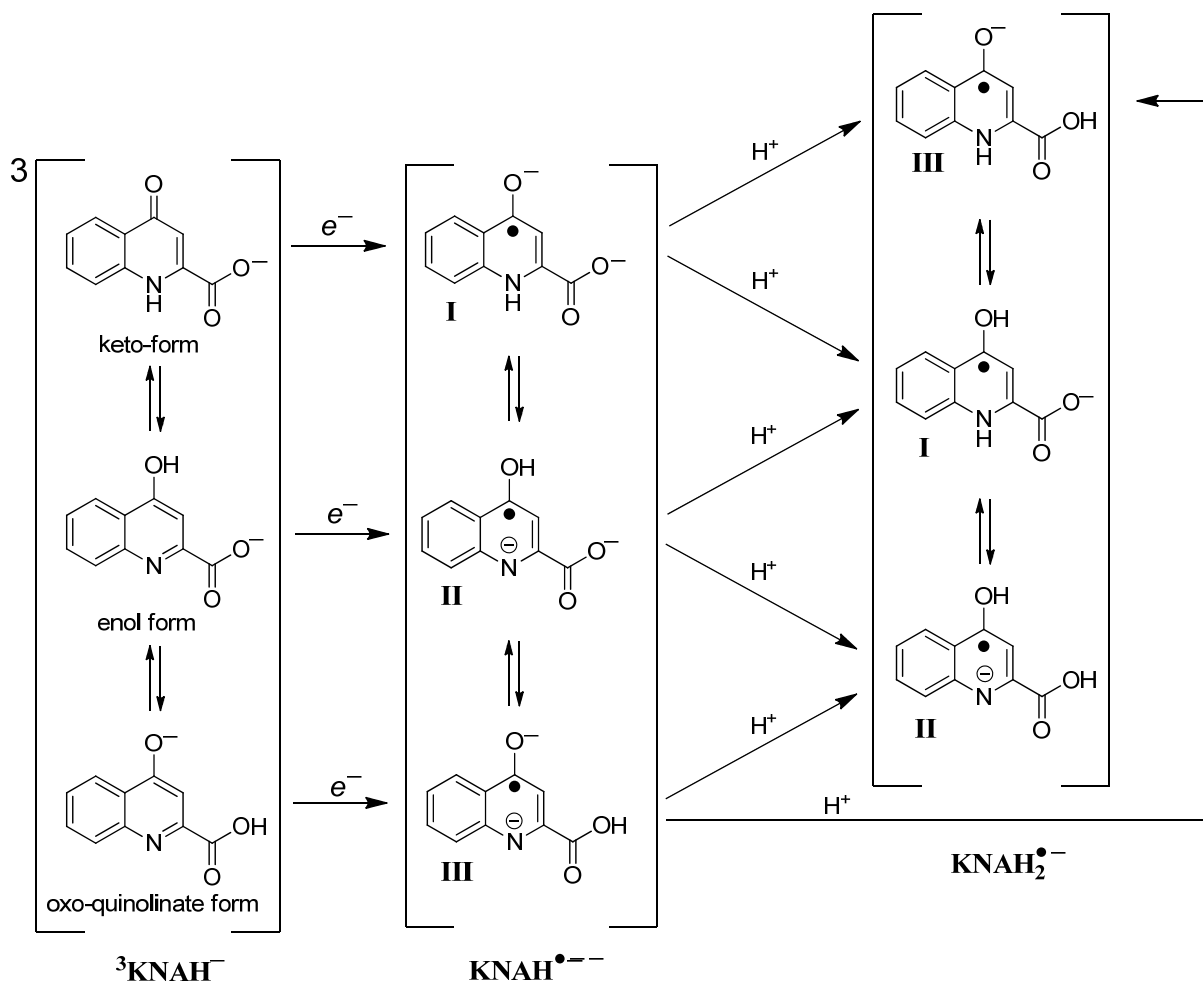

Scheme S1. Possible pathways of proton-coupled electron transfer to different tautomeric forms of triplet kynurenic acid,  $^3\text{KNAH}^-$ , and radical structures formed so far.

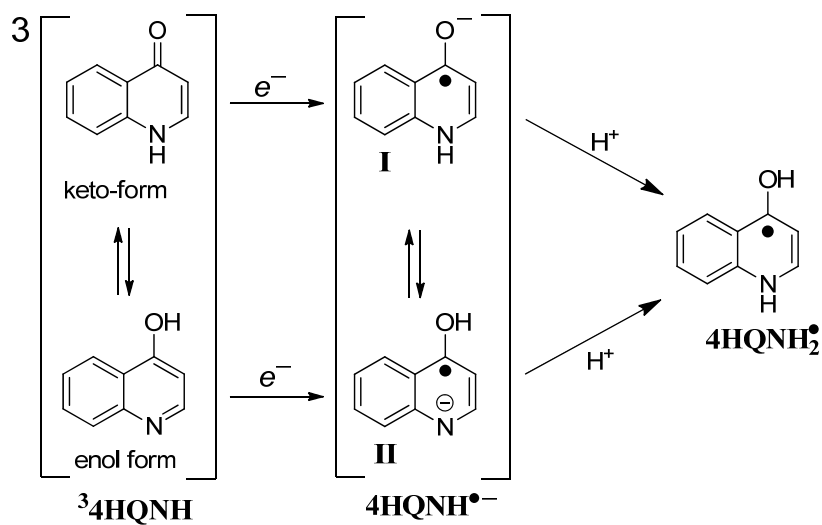

Scheme S2. Possible pathways of proton-coupled electron transfer to different tautomeric forms of triplet 4-hydroxy quinolone,  $^3\text{4HQNH}$ , and radical structures formed so far.

Table S1. Calculated HFCCs of 4-hydroxy quinoline (4HQN) radicals of different structures.

| Radical                                                                                                               | g-factor | Atom   | HFCC, mT |
|-----------------------------------------------------------------------------------------------------------------------|----------|--------|----------|
| 4HQNH <sup>•-</sup> (I)<br>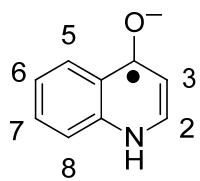          | 2.00323  | N1     | 0.108    |
|                                                                                                                       |          | H1(NH) | -0.201   |
|                                                                                                                       |          | H2     | -0.655   |
|                                                                                                                       |          | H3     | 0.154    |
|                                                                                                                       |          | H5     | -0.608   |
|                                                                                                                       |          | H6     | 0.006    |
|                                                                                                                       |          | H7     | -0.395   |
|                                                                                                                       |          | H8     | -0.372   |
|                                                                                                                       |          | H4(OH) | --       |
| 4HQNH <sup>•-</sup> (II)<br>         | 2.00295  | N1     | 0.277    |
|                                                                                                                       |          | H1(NH) | --       |
|                                                                                                                       |          | H2     | -0.367   |
|                                                                                                                       |          | H3     | -0.037   |
|                                                                                                                       |          | H5     | -0.591   |
|                                                                                                                       |          | H6     | -0.107   |
|                                                                                                                       |          | H7     | -0.293   |
|                                                                                                                       |          | H8     | -0.463   |
|                                                                                                                       |          | H4(OH) | -0.067   |
| 4HQNH <sub>2</sub> <sup>•</sup><br> | 2.00295  | N1     | 0.243    |
|                                                                                                                       |          | H1(NH) | -0.395   |
|                                                                                                                       |          | H2     | -0.826   |
|                                                                                                                       |          | H3     | 0.173    |
|                                                                                                                       |          | H5     | -0.440   |
|                                                                                                                       |          | H6     | -0.016   |
|                                                                                                                       |          | H7     | -0.328   |
|                                                                                                                       |          | H8     | -0.194   |
|                                                                                                                       |          | H4(OH) | -0.124   |

Table S2. Calculated HFCCs of kynurenic acid (KNA) radicals of different structures.

| Radical                                                                                                                     | g-factor | Atom    | HFCC, mT |
|-----------------------------------------------------------------------------------------------------------------------------|----------|---------|----------|
| KNAH <sup>•-</sup> (I)<br>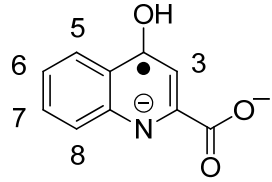                 | 2.00357  | N1      | 0.100    |
|                                                                                                                             |          | H1(NH)  | -0.220   |
|                                                                                                                             |          | H(COOH) | --       |
|                                                                                                                             |          | H3      | 0.067    |
|                                                                                                                             |          | H5      | -0.295   |
|                                                                                                                             |          | H6      | -0.136   |
|                                                                                                                             |          | H7      | -0.108   |
|                                                                                                                             |          | H8      | -0.299   |
|                                                                                                                             |          | H4(OH)  | --       |
| KNAH <sup>•-</sup> (II)<br>                | 2.00321  | N1      | 0.286    |
|                                                                                                                             |          | H1(NH)  | --       |
|                                                                                                                             |          | H(COOH) | --       |
|                                                                                                                             |          | H3      | 0.127    |
|                                                                                                                             |          | H5      | -0.353   |
|                                                                                                                             |          | H6      | -0.296   |
|                                                                                                                             |          | H7      | -0.059   |
|                                                                                                                             |          | H8      | -0.473   |
|                                                                                                                             |          | H4(OH)  | -0.055   |
| KNAH <sup>•-</sup> (III)<br>             | 2.00349  | N1      | 0.196    |
|                                                                                                                             |          | H1(NH)  | --       |
|                                                                                                                             |          | H(COOH) | -0.106   |
|                                                                                                                             |          | H3      | -0.178   |
|                                                                                                                             |          | H5      | -0.042   |
|                                                                                                                             |          | H6      | -0.279   |
|                                                                                                                             |          | H7      | 0.060    |
|                                                                                                                             |          | H8      | -0.279   |
|                                                                                                                             |          | H4(OH)  | --       |
| KNAH <sub>2</sub> <sup>•-</sup> (I)<br>  | 2.00325  | N1      | 0.255    |
|                                                                                                                             |          | H1(NH)  | -0.407   |
|                                                                                                                             |          | H(COOH) | --       |
|                                                                                                                             |          | H3      | 0.206    |
|                                                                                                                             |          | H5      | -0.288   |
|                                                                                                                             |          | H6      | -0.11    |
|                                                                                                                             |          | H7      | -0.176   |
|                                                                                                                             |          | H8      | -0.224   |
|                                                                                                                             |          | H4(OH)  | -0.103   |
| KNAH <sub>2</sub> <sup>•-</sup> (II)<br> | 2.00339  | N1      | 0.343    |
|                                                                                                                             |          | H1(NH)  | --       |
|                                                                                                                             |          | (COOH)  | -0.110   |
|                                                                                                                             |          | H3      | 0.003    |
|                                                                                                                             |          | H5      | -0.025   |
|                                                                                                                             |          | H6      | -0.348   |
|                                                                                                                             |          | H7      | 0.067    |
|                                                                                                                             |          | H8      | -0.338   |
|                                                                                                                             |          | H4(OH)  | -0.037   |

|                                       |                                                                                   |         |         |        |
|---------------------------------------|-----------------------------------------------------------------------------------|---------|---------|--------|
| KNAH <sub>2</sub> <sup>•-</sup> (III) | 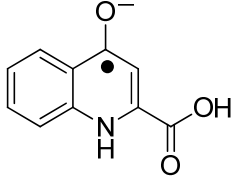 | 2.00364 | N1      | 0.129  |
|                                       |                                                                                   |         | H1(NH)  | -0.247 |
|                                       |                                                                                   |         | H(COOH) | -0.119 |
|                                       |                                                                                   |         | H3      | -0.239 |
|                                       |                                                                                   |         | H5      | -0.065 |
|                                       |                                                                                   |         | H6      | -0.140 |
|                                       |                                                                                   |         | H7      | -0.011 |
|                                       |                                                                                   |         | H8      | -0.167 |
|                                       |                                                                                   |         | H4(OH)  | --     |

Table S3. Calculated HFCCs of neutral tryptophan and N-acetyl tryptophan radicals.

| Radical                                                                                                     | g-factor | Atom           | HFCC, mT |
|-------------------------------------------------------------------------------------------------------------|----------|----------------|----------|
| Trp <sup>•</sup><br>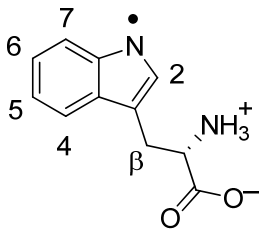       | 2.00282  | N1             | 0.313    |
|                                                                                                             |          | H2             | -0.096   |
|                                                                                                             |          | H4             | -0.492   |
|                                                                                                             |          | H5             | 0.090    |
|                                                                                                             |          | H6             | -0.425   |
|                                                                                                             |          | H7             | -0.041   |
|                                                                                                             |          | β <sub>1</sub> | 1.776    |
|                                                                                                             |          | β <sub>2</sub> | 0.125    |
|                                                                                                             |          | α              | 0.082    |
| N-AcTrp <sup>•</sup><br> | 2.00284  | N1             | 0.325    |
|                                                                                                             |          | H2             | -0.108   |
|                                                                                                             |          | H4             | -0.438   |
|                                                                                                             |          | H5             | 0.067    |
|                                                                                                             |          | H6             | -0.378   |
|                                                                                                             |          | H7             | -0.039   |
|                                                                                                             |          | β <sub>1</sub> | 0.866    |
|                                                                                                             |          | β <sub>2</sub> | 0.818    |
|                                                                                                             |          | α              | 0.214    |

Table S4. HFCCs of neutral N-acetyl tyrosine radical, determined utilizing the CIDNP proportionality relationship between HFCCs and CIDNP intensities detected in the photoreaction of 3,3',4,4'-tetracarboxy benzophenone (TCBP) and N-AcTyr using the known HFCCs for TCBP radicals.<sup>1</sup> CIDNP spectrum is shown in Fig. S1, proportionality relationship – in Fig. S2.

| Radical                                                                           | g-factor | Atom    | HFCC, mT |
|-----------------------------------------------------------------------------------|----------|---------|----------|
| 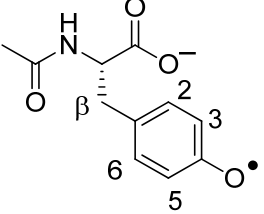 | a        | H2,6    | 0.13     |
|                                                                                   |          | H3,5    | -0.69    |
|                                                                                   |          | $\beta$ | 0.86     |

<sup>a</sup> DFT calculations were not performed for N-AcTyr radical; in calculations of CIDNP using Adrian's model, g-factor known for Tyr radical was used,  $g=2.0041$ .<sup>2</sup>

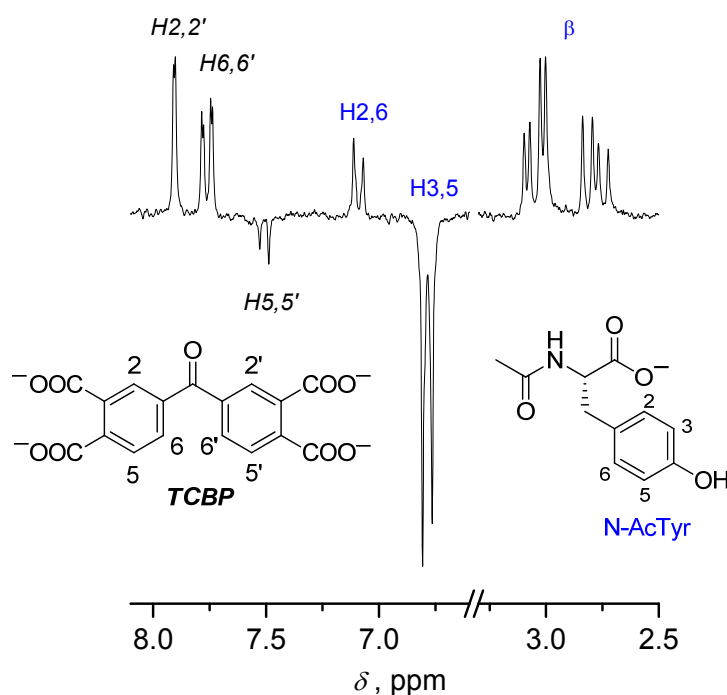

Fig. S1. 200 MHz <sup>1</sup>H CIDNP spectra, obtained in the photoreaction of 0.5 mM 3,3',4,4'-tetracarboxy benzophenone (TCBP) and 2 mM N-acetyl tyrosine in neutral aqueous solution.

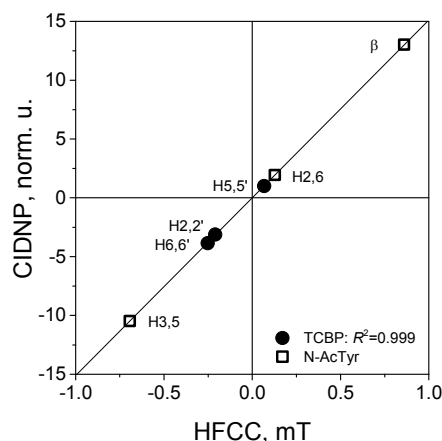

Fig. S2. Correlation between the  $^1\text{H}$  CIDNP intensities of TCBP (solid circles)  $P_{1i}$  and  $-P_{2j}$  of the N-acetyl tyrosine (N-AcTyr, open squares) detected in photoreaction between TCBP and N-AcTyr, and the corresponding  $^1\text{H}$  HFCCs of the TCBP radicals.<sup>1</sup> Solid line: best fit by the function  $P_{1i} = -CA_{1i}$  ( $C > 0$ ). HFCCs for neutral N-AcTyr radical (Table S4) were calculated according to the equation  $A_{2j} = C^{-1}P_{2j}$  (fitting to squares).

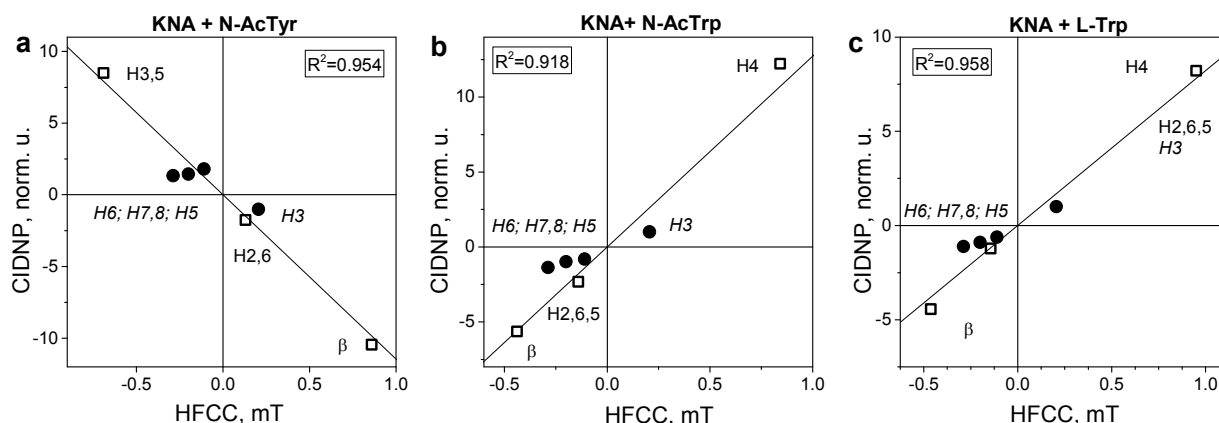

Fig. S3. Correlation between the  $^1\text{H}$  CIDNP intensities  $P_{1i}$  of KNA (solid circles) and  $-P_{2j}$  of the amino acid (open squares) detected in neutral aqueous solution for the photoreaction between KNA and N-AcTyr (a), N-AcTrp (b) or L-Trp (c), and the corresponding  $^1\text{H}$  HFCCs of the radicals  $\text{KNAH}_2^{\bullet-}$  (I) (Table S2),  $\text{N-AcTyrO}^{\bullet}$  (Table S4),  $\text{N-AcTrp}^{\bullet}$  (Table S3),  $\text{Trp}^{\bullet}$  (Table S3). Solid line: best fit by the function  $P_{1i} = CA_{1i}$ ,  $P_{2j} = -CA_{2j}$ .



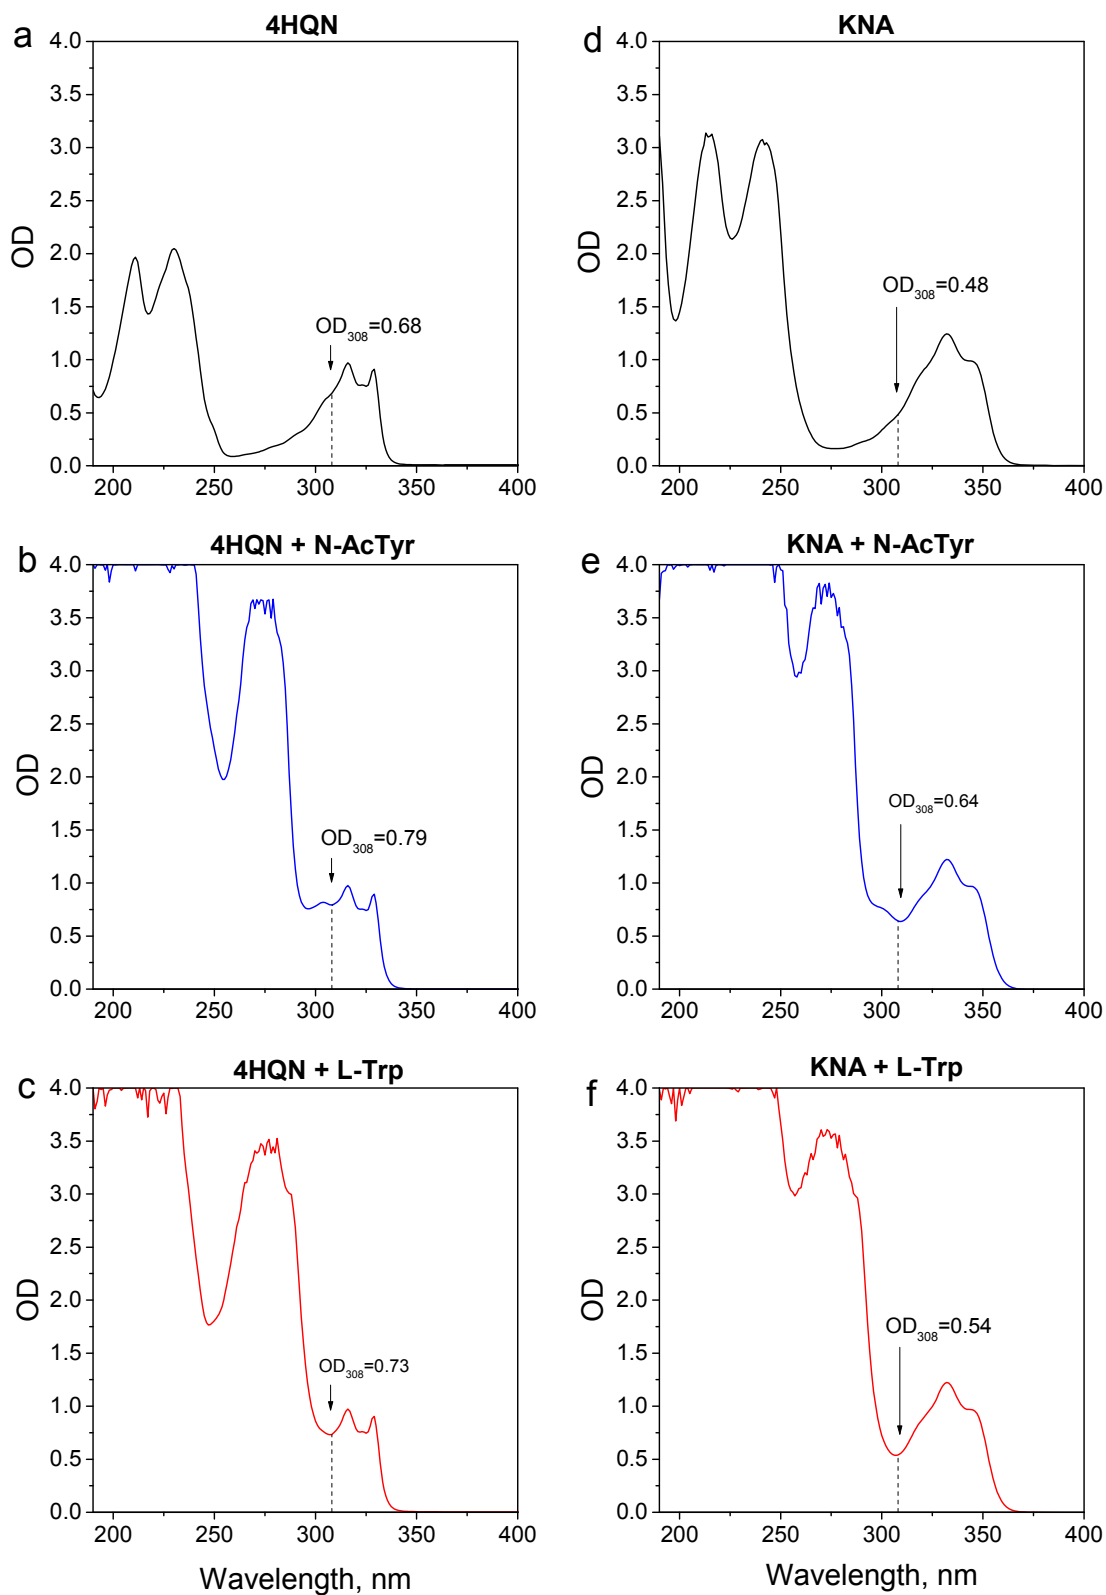

Fig. S4. Absorption spectra of neutral aqueous solutions of (a) 0.4 mM 4HQN; (b) 0.4 mM 4HQN and 20 mM N-acetyl tyrosine; (c) 0.4 mM 4HQN and 4 mM L-tryptophan; (d) 0.6 mM KNA; (e) 0.6 mM KNA and 20 mM N-acetyl tyrosine; (f) 0.6 mM 4KNA and 4 mM L-tryptophan. The optical path length was 2 mm.

## References

1. O. B. Morozova, M. S. Panov, N. N. Fishman and A. V. Yurkovskaya, *Phys. Chem. Chem. Phys.*, 2018, **20**, 21127-21135.
2. M. Tomkiewicz, R. D. McAlpine and M. Cocivera, *Can. J. Chem.*, 1972, **50**, 3849-3856.
